# Supplementary material for: Papillomavirus Infection as Potential Cause of Miscarriage in the Early Gestational Age: A Prospective Study
Source: MDPI journal article supplement (doi:10.3390/diagnostics13091659), 2023-05-08
Supplement: s1 [file s1]

**Table S1. Studies addressing the impact of HPV infection on pregnancy outcome**

| Authors, years | Study Type                                                                                | HPV Detection                     | HPV Type                                                       | Conclusions      |
|----------------|-------------------------------------------------------------------------------------------|-----------------------------------|----------------------------------------------------------------|------------------|
| [21]           | Prospective Study (64 cases)                                                              | Chorionic villi                   | HPV DNA test, PCR                                              | Positive villi   |
| [23]           | prospective study (899 cases)                                                             | placental tissue                  | HPV DNA test e genotyping (PCR)                                | preterm birth    |
| [30]           | Case-control study (80 cases miscarriage 80 cases TOP)                                    | Chorionicvilli                    | PCR, qPCR                                                      | negative         |
| [11]           | Prospective Study (81 cases)                                                              | Decidual and Chorionic villi      | HPV DNA, genotyping                                            | Miscarriage      |
| [32]           | case-control study                                                                        | Chorionic villi                   | HPV DNA test, genotyping, qPCR                                 | preterm delivery |
| [28]           | Prospective Study case-control                                                            | Placental tissue                  | HPV DNA test, PCR                                              | Miscarriage      |
| [12]           | Systematic literature search (42 studies)                                                 | Cervical samples placental tissue | HPV DNA test (PCR)<br>Pathological examination of the placenta | Miscarriage      |
| [24]           | Case-control study (127 cases)                                                            | Cervical samples                  | HPV DNA test (PCR) Genotyping                                  | negative         |
| [25]           | retrospective case-control study, (49 cases)                                              | Cervical samples                  | HPV DNAtest, genotyping PCR                                    | negative         |
| [31]           | Prospective study (35 cases)                                                              | Abdominal chorionic villi         | HPV DNA test genotyping                                        | positive villi   |
| [27]           | Prospective case-control study ( 51 cases with miscariage) women after term delivery (78) | placental tissue                  | HPV DNA test, PCR 16/18                                        | negative         |
| [10]           | Case control study (108 cases)                                                            | Chorionic villi                   | HPV DNAtest genotyping 16, 18, 6, 11                           | preterm delivery |
| [20]           | Prospective study ( 147 cases)                                                            | Abdominal chorionic villi         | HPV DNA test, PCR                                              | No HPV           |
| [13]           | Prospective study                                                                         | Cervical samples                  | HPV DNA test, PCR                                              | Miscarriage      |
